# Supplementary material
Source: PubMed Central journal article supplement (PMC7228841)

**Supplementary Table 1. Nutrient composition of rodent feeds**

|                               | <b>Teklad Global 2018</b>                                                                                                                                                                                              | <b>Teklad Global 2018SX (Sterilizable)</b>                                                                                                                                                                              | <b>Teklad Custom TD.04539 (Casein)</b>                                                                                                                                                                                                                                                                                                                        |
|-------------------------------|------------------------------------------------------------------------------------------------------------------------------------------------------------------------------------------------------------------------|-------------------------------------------------------------------------------------------------------------------------------------------------------------------------------------------------------------------------|---------------------------------------------------------------------------------------------------------------------------------------------------------------------------------------------------------------------------------------------------------------------------------------------------------------------------------------------------------------|
| <b>Protein (%wt)</b>          | 18.6                                                                                                                                                                                                                   | 18.6                                                                                                                                                                                                                    | 15.9                                                                                                                                                                                                                                                                                                                                                          |
| <b>Carbohydrate (%wt)</b>     | 44.2                                                                                                                                                                                                                   | 44.2                                                                                                                                                                                                                    | 62.8                                                                                                                                                                                                                                                                                                                                                          |
| <b>Fat (%wt)</b>              | 6.2                                                                                                                                                                                                                    | 6.2                                                                                                                                                                                                                     | 6.2                                                                                                                                                                                                                                                                                                                                                           |
| <b>Cellulose (%)</b>          | N.R.                                                                                                                                                                                                                   | N.R.                                                                                                                                                                                                                    | 5                                                                                                                                                                                                                                                                                                                                                             |
| <b>Crude fiber (%)</b>        | 3.5                                                                                                                                                                                                                    | 3.5                                                                                                                                                                                                                     | N.R.                                                                                                                                                                                                                                                                                                                                                          |
| <b>Calcium (%)</b>            | 1.0                                                                                                                                                                                                                    | 1.0                                                                                                                                                                                                                     | 0.7                                                                                                                                                                                                                                                                                                                                                           |
| <b>Phosphorus (%)</b>         | 0.7                                                                                                                                                                                                                    | 0.7                                                                                                                                                                                                                     | 0.7                                                                                                                                                                                                                                                                                                                                                           |
| <b>Non-phytate phosphorus</b> | 0.4                                                                                                                                                                                                                    | 0.4                                                                                                                                                                                                                     | 0.6% inorganic sources (calcium phosphate and potassium phosphate) and 0.1% from casein                                                                                                                                                                                                                                                                       |
| <b>Notes</b>                  | <p>Ingredients:<br/>           Carbohydrates: ground wheat, ground corn, wheat middlings.<br/>           Protein: dehulled soybean meal, corn gluten meal, L-lysine, DL-methionine<br/>           Fat: soybean oil</p> | <p>Ingredients:<br/>           Carbohydrates: ground wheat, ground corn, wheat middlings.<br/>           Protein: dehulled soybean meal, corn gluten meal, L-lysine, DL-methionine.<br/>           Fat: soybean oil</p> | <p>Ingredients:<br/>           Carbohydrates: sucrose, corn starch, maltodextrin<br/>           Protein: casein<br/>           Fat: soybean oil<br/>           Vitamins: AIN-93-VX, choline bitartrate<br/>           Mineral mix (calcium-phosphate deficient)<br/>           Calcium phosphate dibasic, calcium chloride, potassium phosphate monobasic</p> |

**N.R., not reported**

**Supplementary Table 2.**

|                                           | <b>AC</b>                                                                                                                                                          | <b>AC + Casein</b>                                                                                                                                                 | <b>Non-AC + Casein</b>                                                                                                                                       |
|-------------------------------------------|--------------------------------------------------------------------------------------------------------------------------------------------------------------------|--------------------------------------------------------------------------------------------------------------------------------------------------------------------|--------------------------------------------------------------------------------------------------------------------------------------------------------------|
| <b>Location of experiments</b>            | IUSM                                                                                                                                                               | IUSM                                                                                                                                                               | Purdue University                                                                                                                                            |
| <b>Duration of study</b>                  | 28wk                                                                                                                                                               | 28wk                                                                                                                                                               | 30wk                                                                                                                                                         |
| <b>Diet</b>                               | Teklad Global 2018SX (sterilizable)                                                                                                                                | Teklad Global 2018SX (sterilizable) and Envigo custom diet TD.04539                                                                                                | Teklad Global 2018 (non-sterilizable) and Envigo custom diet TD.04539                                                                                        |
| <b>Intestinal dissection protocol</b>     | Moe et al. <sup>1</sup> : duodenum was dissected 1cm proximal to pyloric-duodenal junction to ~50cm of ileocecal junction. Jejunum was ~30cm of ileocecal junction | Moe et al. <sup>1</sup> : duodenum was dissected 1cm proximal to pyloric-duodenal junction to ~50cm of ileocecal junction. Jejunum was ~30cm of ileocecal junction | Vorland et al. <sup>2</sup> : duodenum was dissected from pyloric-duodenal junction until the ligament of Treitz and ~8cm of jejunum distal to the ligament. |
| <b>RNA extraction method</b>              | Qiagen MiRNeasy Mini Kit                                                                                                                                           | Qiagen MiRNeasy Mini Kit                                                                                                                                           | R6812-00, Omega Bio-tek                                                                                                                                      |
| <b>Biochemistries and gene expression</b> | All performed at IUSM                                                                                                                                              | All performed at IUSM                                                                                                                                              | All performed at IUSM                                                                                                                                        |
| <b>Other</b>                              |                                                                                                                                                                    |                                                                                                                                                                    | Rats were placed in metabolic cages 4 days before sacrifice                                                                                                  |

AC, autoclaved diet; Non-AC, non-autoclaved diet; IUSM, Indiana University School of Medicine.

1. Moe SM, Radcliffe JS, White KE, et al. The pathophysiology of early-stage chronic kidney disease-mineral bone disorder (CKD-MBD) and response to phosphate binders in the rat. *J Bone Miner Res.* 2011;26(11):2672-2681.
2. Vorland CJB, A.; Lachcik, P.J.; Srinivasan, S.; Chen, N.X.; Moe, S.M.; Hill Gallant, K.M. . Kidney Disease Progression Does Not Decrease Intestinal Phosphorus Absorption in a Rat Model of Chronic Kidney Disease-Mineral and Bone Disorder. *J Bone Miner Res.* 2019;Pending minor revisions.

# Supplemental Figure 1. Experimental Design

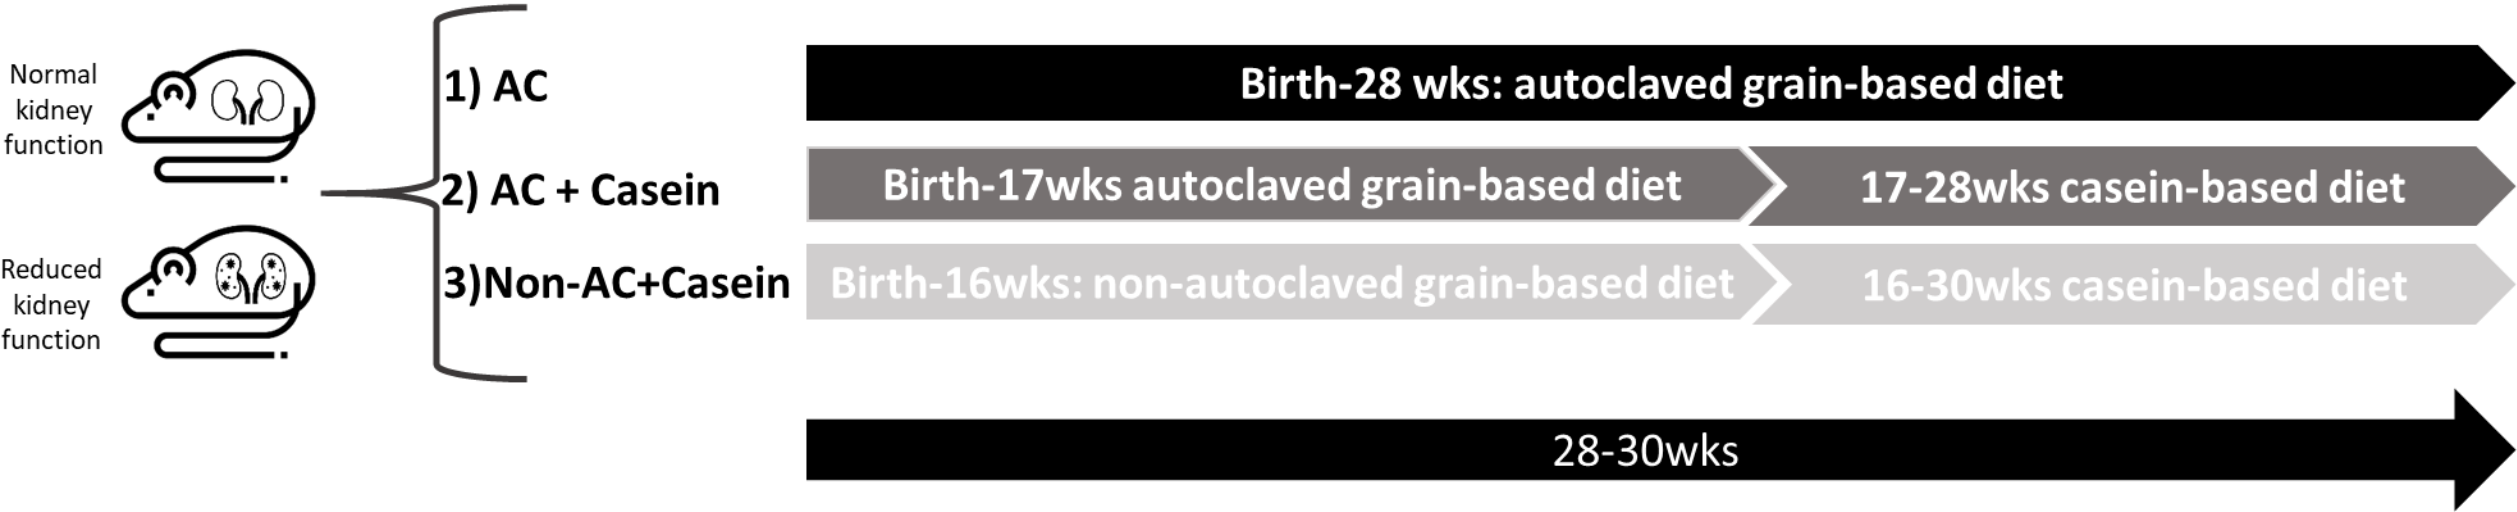

Supplement: NIHMS1573681-supplement-1.pdf [file NIHMS1573681-supplement-1.pdf]
